CORRECTION

# Correction: Comparison of Anesthesia-Controlled Operating Room Time between Propofol-Based Total Intravenous Anesthesia and Desflurane Anesthesia in Open Colorectal Surgery: A Retrospective Study

The *PLOS ONE* Staff

## Notice of Republication

This article was republished on November 3, 2016, to correct an error where an ORCID iD was erroneously assigned to Wei-Hung Chan. The publisher apologizes for this error.

## Reference

1. Chan W-H, Lee M-S, Lin C, Wu C-C, Lai H-C, Chan S-M, et al. (2016) Comparison of Anesthesia-Controlled Operating Room Time between Propofol-Based Total Intravenous Anesthesia and Desflurane Anesthesia in Open Colorectal Surgery: A Retrospective Study. *PLoS ONE* 11(10): e0165407. doi: [10.1371/journal.pone.0165407](https://doi.org/10.1371/journal.pone.0165407) PMID: [27780241](https://pubmed.ncbi.nlm.nih.gov/27780241/)

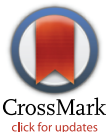

## OPEN ACCESS

**Citation:** The *PLOS ONE* Staff (2016) Correction: Comparison of Anesthesia-Controlled Operating Room Time between Propofol-Based Total Intravenous Anesthesia and Desflurane Anesthesia in Open Colorectal Surgery: A Retrospective Study. *PLoS ONE* 11(12): e0168310. doi:10.1371/journal.pone.0168310

**Published:** December 8, 2016

**Copyright:** © 2016 The PLOS ONE Staff. This is an open access article distributed under the terms of the [Creative Commons Attribution License](https://creativecommons.org/licenses/by/4.0/), which permits unrestricted use, distribution, and reproduction in any medium, provided the original author and source are credited.
